# Supplementary material
Source: PubMed Central journal article supplement (PMC4070435)

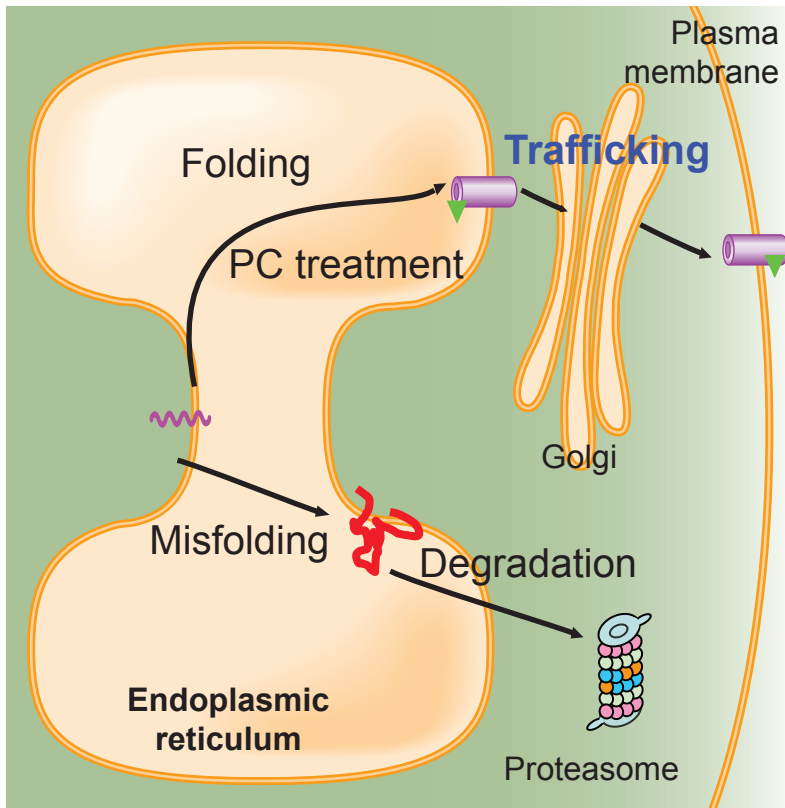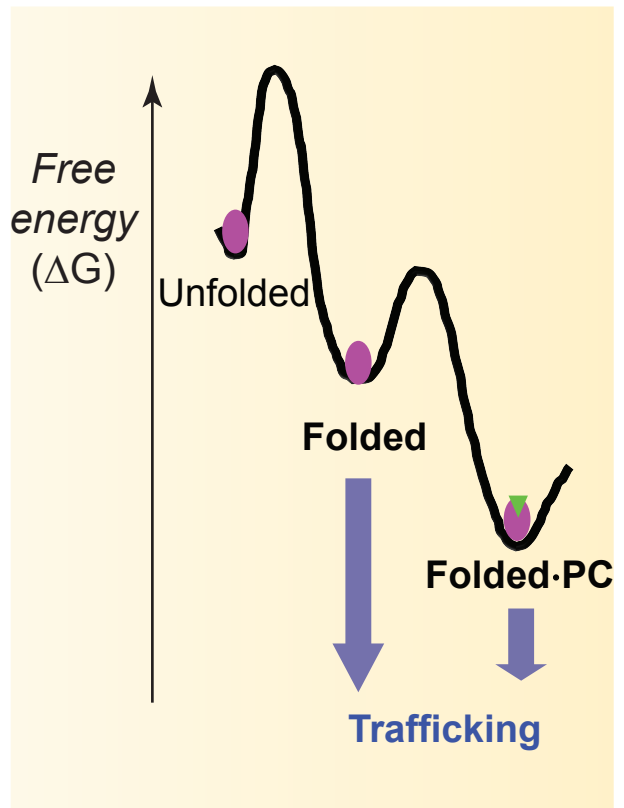

▼ Pharmacological chaperone (PC)

● Target protein

# Graphic Abstract

Supplement: NIHMS587315-supplement-01.pdf [file NIHMS587315-supplement-01.pdf]
